# Supplementary material for: Suppression of hyperinsulinaemia in growing female mice provides long-term protection against obesity
Source: Springer Nature journal article supplement (doi:10.1007/s00125-015-3676-7), 2015-07-08
Supplement: MOESM1 [file 8093150]

**ESM Table 1. Primer sequences used for real-time PCR mRNA quantification.**

| Gene                   |                                                      | Forward primer (5' to 3') | Reverse primer (5' to 3') |
|------------------------|------------------------------------------------------|---------------------------|---------------------------|
| TaqMan Assays          |                                                      |                           |                           |
| <i>Ins2</i>            | Insulin 2                                            | GAAGTGGAGGACCCACAAGTG     | GATCTACAATGCCACGCTTCTG    |
| <i>Actb</i>            | $\beta$ -actin <sup>1</sup>                          |                           |                           |
| SYBR Green Primer Sets |                                                      |                           |                           |
| <i>Pdx1</i>            | Pancreatic and duodenal homeobox 1                   | GACCTTCCCGAATGGAACC       | GTTCCGCTGTGTAAGCACC       |
| <i>Hnf1a</i>           | Hepatocyte nuclear factor 1- $\alpha$                | GCACACCCATGAAGACACAG      | CCTGTGGGCTCTTCAATCAG      |
| <i>Slc2a2</i>          | GLUT-2                                               | CTGTGTCCAGCTTGCAGTG       | CCATCAAGAGGGCTCCAGTC      |
| <i>Gck</i>             | Glucokinase                                          | GTTTTGTGTCGCAGGTGGAG      | GTGGACACGCTTTCACAGG       |
| <i>Actb</i>            | $\beta$ -actin                                       | TGCGTGACATCAAAGAGAAG      | GATGCCACAGGATTCCATA       |
| <i>Cebpa</i>           | CCAAT/enhancer-binding protein- $\alpha$             | CCGGGAGAACTCTAACTC        | GATGTAGGCGCTGATGT         |
| <i>Cebpb</i>           | CCAAT/enhancer-binding protein- $\beta$              | GCAAGAGCCGCGACAAG         | GGCTCGGGCAGCTGCTT         |
| <i>Pparg</i>           | Peroxisome proliferator-activated receptor- $\gamma$ | AGATTCTCCTGTTGACCCAGA     | ACAGAGCTGATTCCGAAGTTG     |
| <i>Pgcl1</i>           | PPAR- $\gamma$ coactivator 1- $\alpha$               | GTGCCATATCTCCAGTGACC      | GGTTGGCTTTATGAGGAGGA      |
| <i>Prdm16</i>          | PR domain containing 16                              | CTCAAGTACATCCGTGTAGCG     | CTTTCACATGCACCAACAGTTC    |
| <i>Srebpl1c</i>        | Sterol regulatory element-binding protein 1-c        | CGGAAGCTGTCCGGGGTAG       | GTTGTTGATGAGCTGGAGCA      |
| <i>Acaca</i>           | Acetyl-CoA carboxylase $\alpha$                      | GCCTCTCTGACAAACGAG        | TGACTGCCGAAACATCTCTG      |
| <i>Fasn</i>            | Fatty acid synthase                                  | TGGGTTCTAGCCAGCAGAGT      | ACCACCAGAGACCGTTATGC      |
| <i>Lpl</i>             | Lipoprotein lipase                                   | GTGACCGATTCATCAAGTTGGAG   | GACGGACACAAAGTTAGCACCAC   |
| <i>Pck1</i>            | Phosphoenolpyruvate carboxykinase-1                  | GTATCATCTTGGTGGCCGTA      | TGATCTTGCCCTTGTTCTG       |
| <i>Pnpla2</i>          | Adipose triglyceride lipase                          | AACACCAGCATCCAGTTCAA      | GGTTCAGTAGGCCATTCTC       |
| <i>Lipe</i>            | Hormone-sensitive lipase                             | ACCGAGACAGGCTCAGTGTG      | GAATCGGCCACCGGTAAGAG      |
| <i>Ucp1</i>            | Uncoupling protein 1                                 | CCTGGCAGATATCATCACCTTC    | TCCCTAGGACACCTTATACT      |
| <i>Hprt</i>            | Hypoxanthine guanine phosphoribosyl transferase      | TCCTCCTCAGACCGCTTTT       | CCTGGTTCATCATCGCTAATC     |
| <i>Tbp</i>             | TATA box binding protein                             | TTCACCAATGACTCCTATGACC    | CAAGTTTACAGCCAAGATTACCG   |

<sup>1</sup>Commercial primer assay (Catalog number 4352341E, Applied Biosystems)  
Other primers/PrimeTime qPCR assays are from Integrated DNA Technologies, Toronto, ON, Canada.
